# Supplementary material for: A corrosion-engineered transition metal multi-anionic interface for efficient electrocatalysis toward overall water splitting
Source: Royal Society of Chemistry journal article supplement (doi:10.1039/d3nj04235a), 2023-01-01
Supplement: d3nj04235a1.pdf [file d3nj04235a1.pdf]

## Supporting Information

### **Corrosion-engineered transition metal multi-anionic interface for efficient electrocatalysis toward overall water splitting**

Qiaolin Guo<sup>a</sup>, Xiang Liu<sup>a</sup>, Changwang Ke<sup>a</sup>, Weiping Xiao<sup>a,b\*</sup>, Xiaofei Yang<sup>a\*</sup>

a. College of Science, Institute of Materials Physics and Chemistry, Nanjing Forestry University, Nanjing 210037, China

b. Key Laboratory of Advanced Energy Materials Chemistry (Ministry of Education), College of Chemistry, Nankai University, Tianjin 300071, China

\*Corresponding author

E-mail address: wpxiao@njfu.edu.cn; xiaofei.yang@njfu.edu.cn

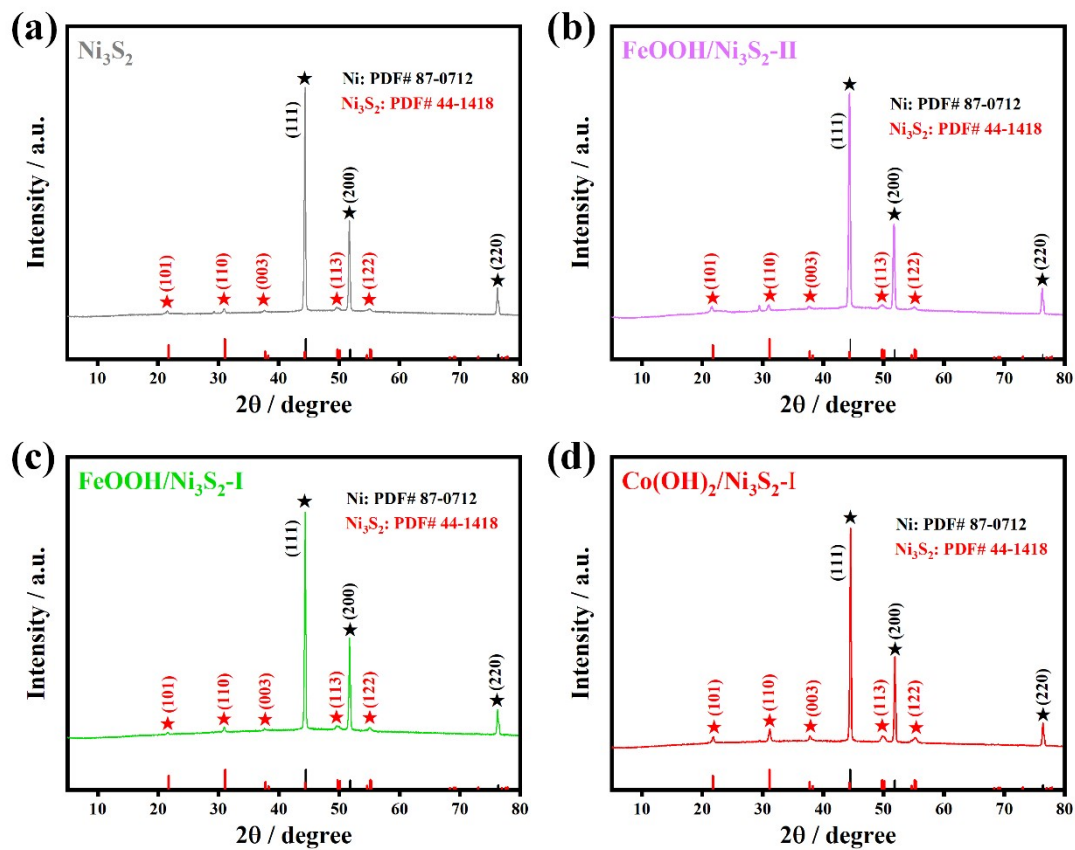

**Figure S1.** XRD patterns of samples: (a)  $\text{Ni}_3\text{S}_2$ , (b)  $\text{FeOOH}/\text{Ni}_3\text{S}_2\text{-II}$ , (c)  $\text{FeOOH}/\text{Ni}_3\text{S}_2\text{-I}$ , (d)  $\text{Co(OH)}_2/\text{Ni}_3\text{S}_2\text{-I}$ .

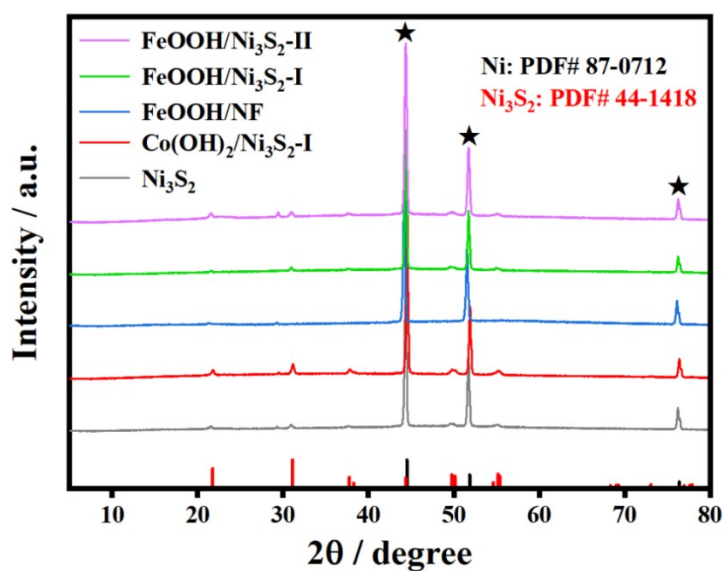

**Figure S2.** XRD patterns of samples  $\text{FeOOH}/\text{Ni}_3\text{S}_2\text{-II}$ ,  $\text{FeOOH}/\text{Ni}_3\text{S}_2\text{-I}$ ,  $\text{FeOOH}/\text{NF}$ ,  $\text{Co(OH)}_2/\text{Ni}_3\text{S}_2\text{-I}$  and  $\text{Ni}_3\text{S}_2$ .

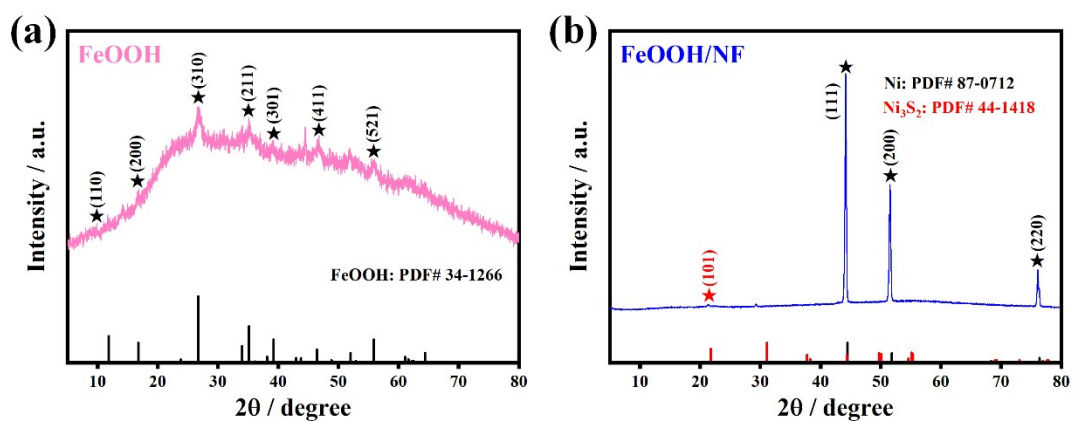

**Figure S3.** XRD patterns: (a) the precipitation of FeOOH was collected during the preparation process, and (b) FeOOH/NF.

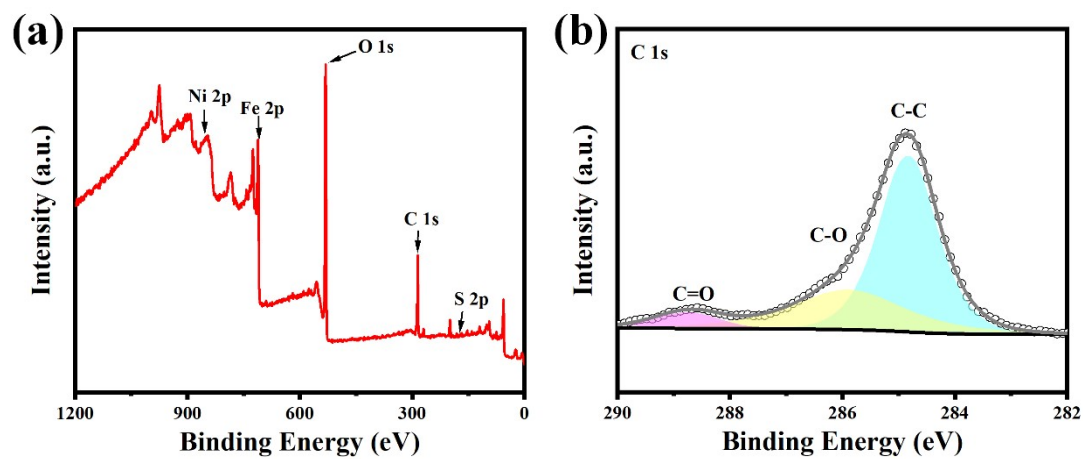

**Figure S4.** The X-ray photoelectron spectroscopy of FeOOH/ $\text{Ni}_3\text{S}_2$ -II: (a) The XPS survey spectrum, (b) High-resolution XPS spectrum of C 1s.

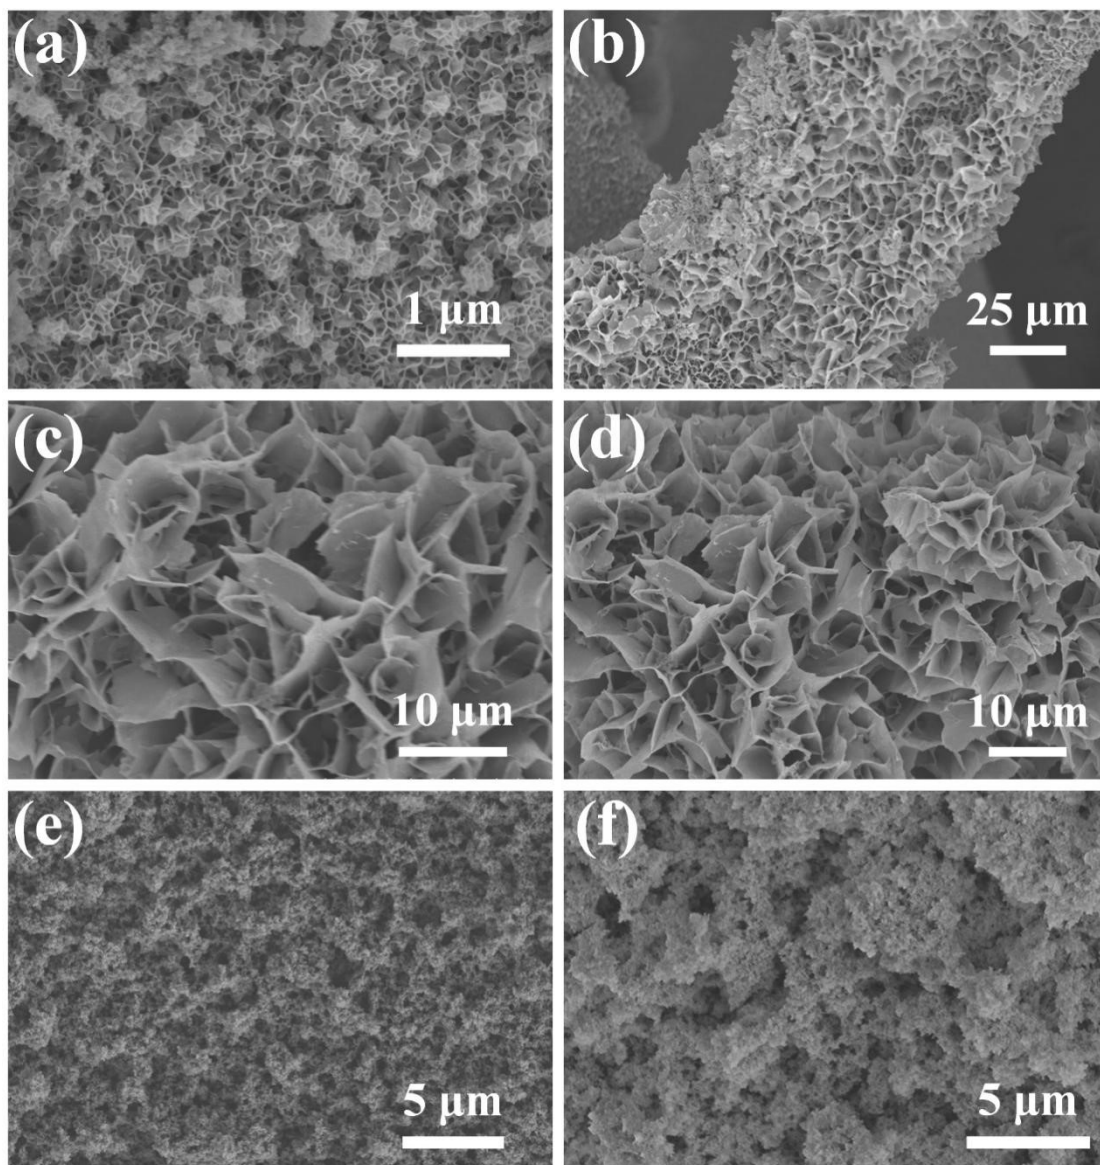

**Figure S5.** SEM images: (a) FeOOH/Ni<sub>3</sub>S<sub>2</sub>-II, (b-d) FeOOH/Ni<sub>3</sub>S<sub>2</sub>-I, (e, f) FeOOH.

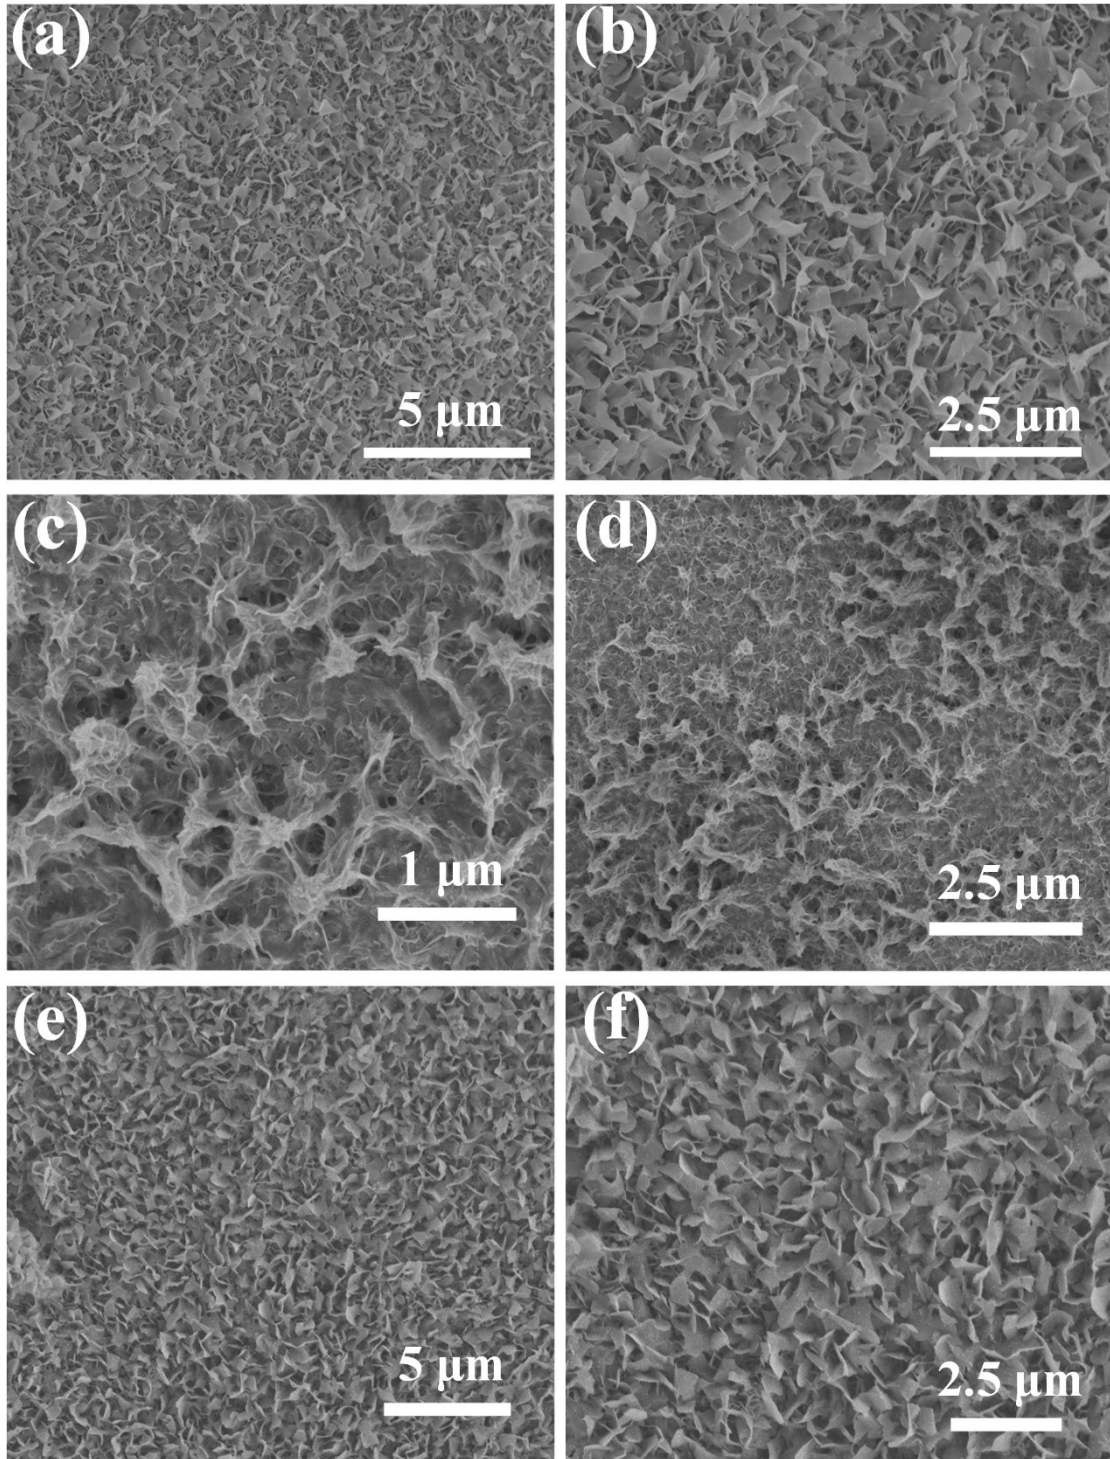

**Figure S6.** SEM images: (a, b)  $\text{Co(OH)}_2/\text{Ni}_3\text{S}_2\text{-II}$ , (c, d)  $\text{Co(OH)}_2/\text{Ni}_3\text{S}_2\text{-I}$ , (e, f)  $\text{Co(OH)}_2$ .

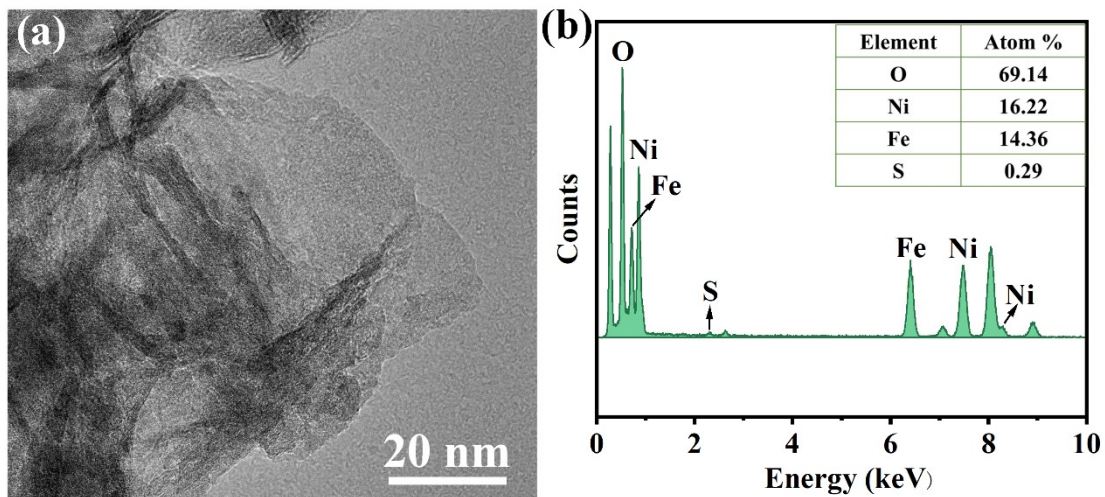

Figure S7. (a) TEM image of FeOOH/Ni<sub>3</sub>S<sub>2</sub>-II, (b) EDS spectrum of FeOOH/Ni<sub>3</sub>S<sub>2</sub>-II.

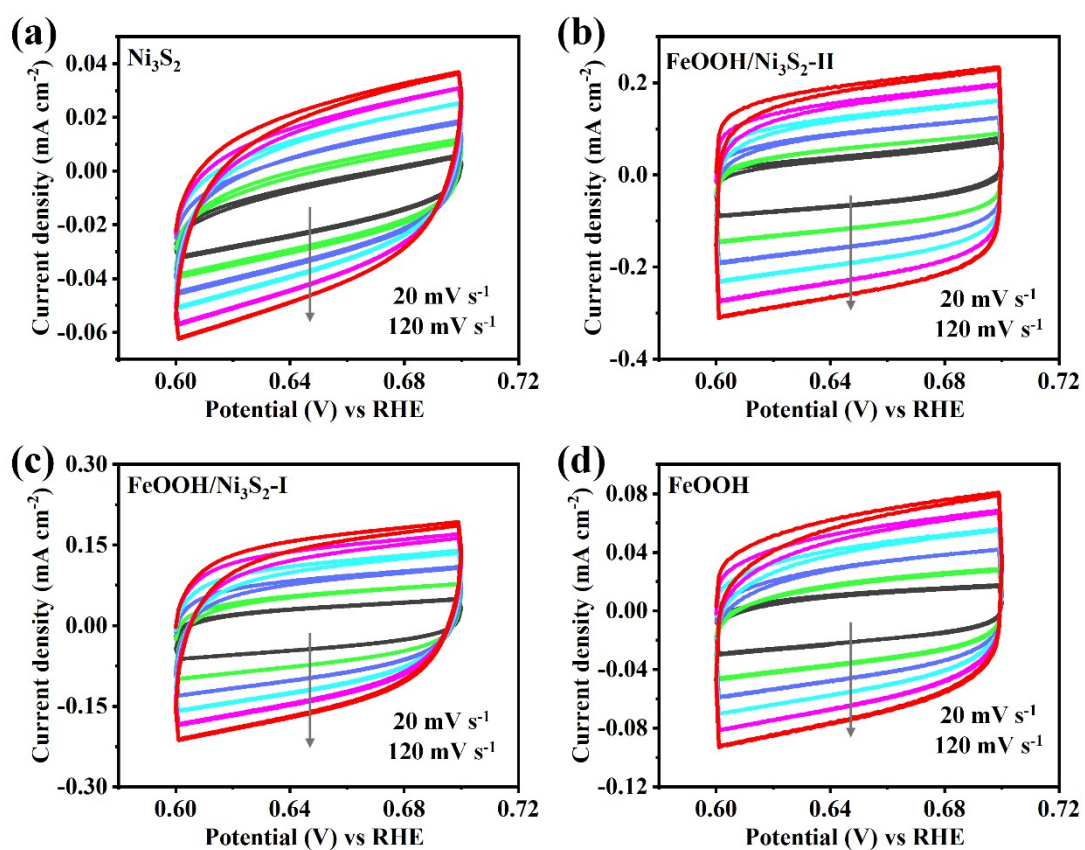

Figure S8. Cyclic voltammograms of (a) Ni<sub>3</sub>S<sub>2</sub>, (b) FeOOH/Ni<sub>3</sub>S<sub>2</sub>-II, (c) FeOOH/Ni<sub>3</sub>S<sub>2</sub>-I, (d) FeOOH.

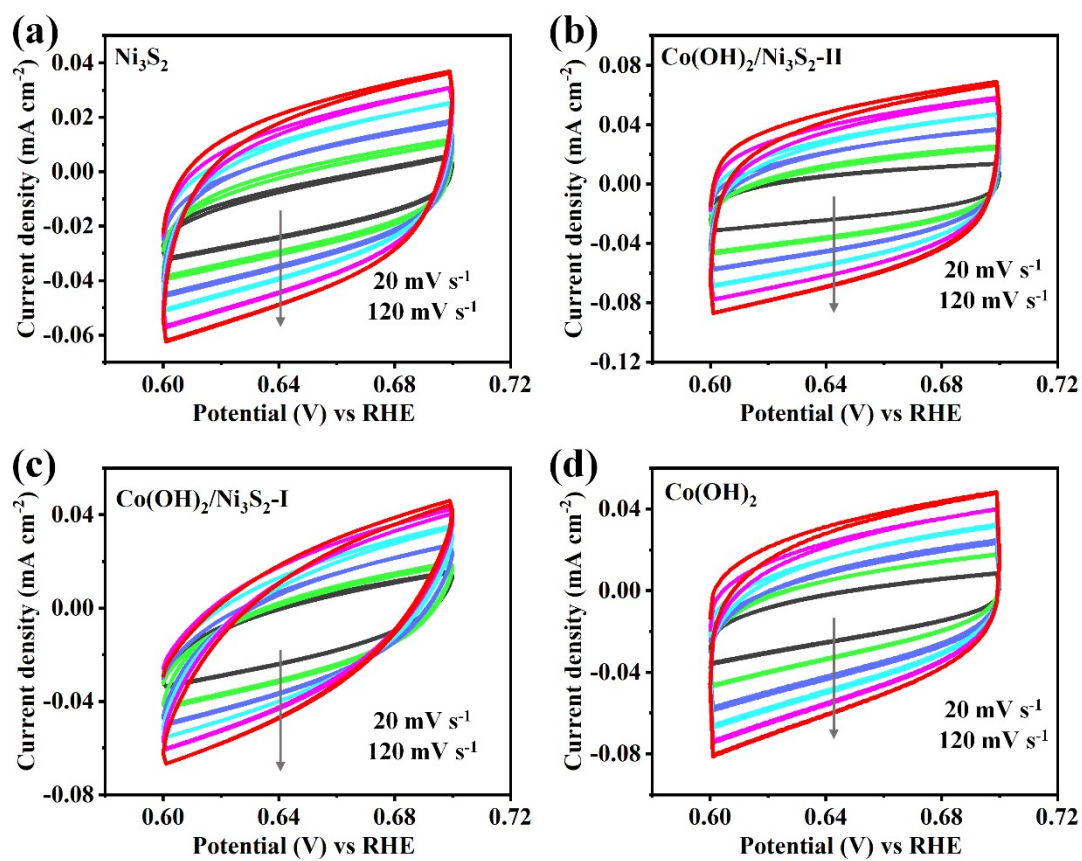

**Figure S9.** Cyclic voltammetry curves of (a)  $\text{Ni}_3\text{S}_2$ , (b)  $\text{Co(OH)}_2/\text{Ni}_3\text{S}_2\text{-II}$ , (c)  $\text{Co(OH)}_2/\text{Ni}_3\text{S}_2\text{-I}$ , (d)  $\text{Co(OH)}_2$ .

**Table S1.** Comparison of the OER performance of catalysts reported in literatures. (Current density: 100 mA cm<sup>-2</sup>).

| Catalysts                                               | Overpotential | Substrate  | Reference |
|---------------------------------------------------------|---------------|------------|-----------|
| FeOOH/Ni <sub>3</sub> S <sub>2</sub> -II                | 269 mV        | Ni foam    | This work |
| Co(OH) <sub>2</sub> /Ni <sub>3</sub> S <sub>2</sub> -II | 348 mV        | Ni foam    | This work |
| FeOOH-Fe <sub>2.0</sub>                                 | 263 mV        | Ni foam    | [1]       |
| NiFe(OH) <sub>x</sub> /FeS/IF                           | 261 mV        | Iron foam  | [2]       |
| Ni-FeOOH/NF                                             | 277 mV        | Ni foam    | [3]       |
| FF-Na <sub>500</sub> Ni <sub>500</sub>                  | 212 mV        | Fe Foam    | [4]       |
| FeNi(OH) <sub>x</sub> /FeS/IF                           | 273 mV        | Iron foam  | [5]       |
| NiFe/NF                                                 | 290 mV        | Ni foam    | [6]       |
| 2D Co <sub>3</sub> O <sub>4</sub>                       | 380 mV        | Co powders | [7]       |
| NiCo-OH                                                 | 376 mV        | Ni foam    | [8]       |
| Ni <sub>5</sub> Co <sub>3</sub> Mo-OH                   | 304 mV        | Ni foam    | [8]       |
| Ni-Co-S/CF                                              | 363 mV        | Cu foam    | [9]       |
| Fe-Co-Ni hydroxide                                      | 319 mV        | Ni foam    | [10]      |



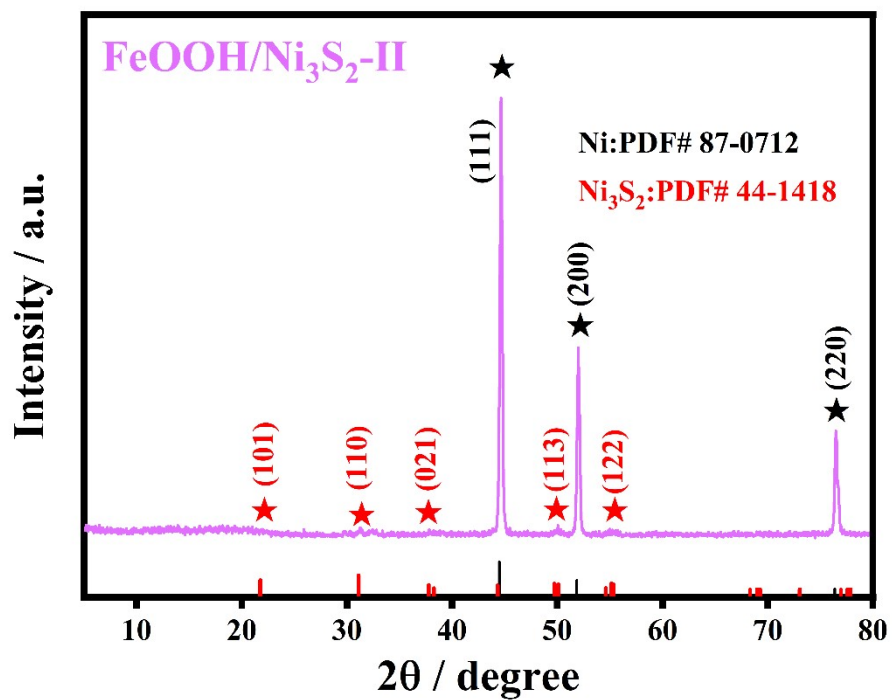

**Figure S10.** The XRD image after the OER of FeOOH/Ni<sub>3</sub>S<sub>2</sub>-II.

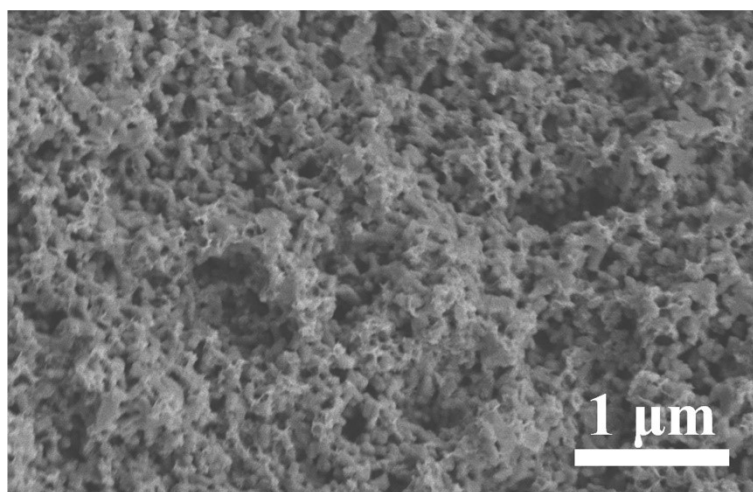

**Figure S11.** The SEM image after the OER of FeOOH/Ni<sub>3</sub>S<sub>2</sub>-II.

## References

1. C. Ke, Q. Zhao, Y. Zhang, X. Yang and W. Xiao, *J. Alloy. Compd.*, 2023, **955**, 170131.
2. S. Niu, W.-J. Jiang, T. Tang, L.-P. Yuan, H. Luo and J.-S. Hu, *Adv. Funct. Mater.*, 2019, **29**, 1902180.
3. L. Li, Z. Wang, X. She, L. Pan, C. Xi, D. Wang, J. Yi and J. Yang, *J. Colloid Interface Sci.*, 2023, **652**, 789-797.
4. X. Liu, M. Gong, D. Xiao, S. Deng, J. Liang, T. Zhao, Y. Lu, T. Shen, J. Zhang and D. Wang, *Small*, 2020, **16**, 2000663.
5. Q.-W. Chen, X.-Y. Zhang, Y.-W. Dong, B.-Y. Guo, Y. Ma, L. Wang, R.-Q. Lv, Y.-L. Zhou, Y.-M. Chai and B. Dong, *J. Alloy. Compd.*, 2020, **835**, 155298.
6. H. Deng, H. Feng, G. Luo, R. Tu, Y. Zheng and Q. Shen, *Mater. Lett.*, 2022, **316**, 131999.
7. Y. Kang, H. Xie, D. Liu, M. Gao, P. K. Chu, S. Ramakrishna and X.-F. Yu, *Chem. Commun.*, 2019, **55**, 11406-11409.
8. S. Y. Hao, L. C. Chen, C. L. Yu, B. Yang, Z. J. Li, Y. Hou, L. C. Lei and X. W. Zhang, *ACS Energy Lett.*, 2019, **4**, 952-959.
9. T. Liu, X. Sun, A. M. Asiri and Y. He, *Int. J. Hydrog. Energy*, 2016, **41**, 7264-7269.
10. Q. L. Liu, H. Zhang, J. Xu, L. Z. Wei, Q. C. Liu and X. K. Kong, *Inorg. Chem.*, 2018, **57**, 15610-15617.
